# Supplementary material for: Genomic, Proteomic, and Biochemical Analyses of Oleaginous Mucor circinelloides: Evaluating Its Capability in Utilizing Cellulolytic Substrates for Lipid Production
Source: PubMed Central journal article supplement (PMC3762813; doi:10.1371/journal.pone.0071068), 2013-09-04
Supplement: pone.0071068.s002.pdf [file pone.0071068.s002.pdf]

**Manuscript title:** Genomic, proteomic, and biochemical analyses of oleaginous *Mucor circinelloides*: Evaluating its capability in utilizing cellulolytic substrates for lipid production

**Supplemental Table S2.** List of Peptide sequences and proteins identified in the bands of A0-A9 and B0-B8 from concentrator- and ethanol-prepared protein samples, respectively.

| <b>Band A0</b> |            |              |                |                                                                                                                                                                                                                                                                                                                  |
|----------------|------------|--------------|----------------|------------------------------------------------------------------------------------------------------------------------------------------------------------------------------------------------------------------------------------------------------------------------------------------------------------------|
| Hits           | Protein ID | Protein Mass | No. of Peptide | Peptide sequences                                                                                                                                                                                                                                                                                                |
| 1              | 156167     | 64906.84     | 3              | ADTFILIADSILK<br>FASLYSINQNLYLGNAGR<br>IDSFWNSNGQYVSQSVTGGVSK                                                                                                                                                                                                                                                    |
| <b>Band A1</b> |            |              |                |                                                                                                                                                                                                                                                                                                                  |
| Hits           | Protein ID | Protein Mass | No. of Peptide | Peptide sequences                                                                                                                                                                                                                                                                                                |
| 1              | 155115     | 37564.85     | 11             | SKNIVGADQFTK<br>TLILITFDENASTSK<br>TLILITFDENASTSK<br>TLILITFDENASTSK<br>GTTDSTFYTHFSSLSTVEHNWDLGNLGR<br>AFDHILQVWFENQDYSTIAK<br>AFDHILQVWFENQDYSTIAK<br>RNQVWSLLGNIPANLK<br>AFDHILQVWFENQDYSTIAK<br>NQVWSLLGNIPANLK<br>NQVWSLLGNIPANLK                                                                          |
| 2              | 156269     | 42262.39     | 3              | SWSIQYGDGSTASGILAK<br>TPVDNLISQGLISSPVFGVWLK<br>AGTTSVASSFSGILDTGTTTTLFTQSVASK                                                                                                                                                                                                                                   |
| <b>Band A2</b> |            |              |                |                                                                                                                                                                                                                                                                                                                  |
| Hits           | Protein ID | Protein Mass | No. of Peptide | Peptide sequences                                                                                                                                                                                                                                                                                                |
| 1              | 156269     | 42262.39     | 12             | NNYVVFNQK<br>NNYVVFNQK<br>SWSIQYGDGSTASGILAK<br>DTVNLGGLVIK<br>ASNGGGGEYLFGGSPNPNHYTGALTTPVVDK<br>TPVDNLISQGLISSPVFGVWLK<br>TPVDNLISQGLISSPVFGVWLK<br>TPVDNLISQGLISSPVFGVWLK<br>AGTTSVASSFSGILDTGTTTTLFTQSVASK<br>AGTTSVASSFSGILDTGTTTTLFTQSVASK<br>ESSSFASDPIDGLMGLGFDTITTVAGIK<br>ESSSFASDPIDGLMGLGFDTITTVAGIK |
| 2              | 155115     | 37564.85     | 7              | VYQESIPSVGYTGYK<br>TLILITFDENASTSK<br>GTTDSTFYTHFSSLSTVEHNWDLGNLGR<br>GTTDSTFYTHFSSLSTVEHNWDLGNLGR<br>AFDHILQVWFENQDYSTIAK<br>RNQVWSLLGNIPANLK<br>NQVWSLLGNIPANLK                                                                                                                                                |
| 3              | BAD95808   | 34332.99     | 2              | YYSQCLPGSHSNNAGNASSTK<br>TSTTAAASTSTSSSAGYK                                                                                                                                                                                                                                                                      |
| <b>Band A3</b> |            |              |                |                                                                                                                                                                                                                                                                                                                  |
| Hits           | Protein ID | Protein Mass | No. of Peptide | Peptide sequences                                                                                                                                                                                                                                                                                                |
| 1              | 156806     | 34114.32     | 2              | GLIYTQNNQVIK<br>SNAPNPNNWGTPMAAFPVSGK                                                                                                                                                                                                                                                                            |
| 2              | 155646     | 18948.17     | 1              | SAHYASTANYQQVTGR                                                                                                                                                                                                                                                                                                 |

| <b>Band A4</b> |            |              |                |                                                                                                                                                                                                                                                                                                                                                                                                                                                                      |
|----------------|------------|--------------|----------------|----------------------------------------------------------------------------------------------------------------------------------------------------------------------------------------------------------------------------------------------------------------------------------------------------------------------------------------------------------------------------------------------------------------------------------------------------------------------|
| Hits           | Protein ID | Protein Mass | No. of Peptide |                                                                                                                                                                                                                                                                                                                                                                                                                                                                      |
| 1              | 115037     | 20656.54     | 19             | TSGYAQVTGTIDR<br>TSGYAQVTGTIDR<br>TSGYAQVTGTIDR<br>TSGYAQVTGTIDR<br>TSGYAQVTGTIDR<br>TSGYAQVTGTIDR<br>TSGYAQVTGTIDR<br>TSGYAQVTGTIDR<br>TSGYAQVTGTIDR<br>TSGYAQVTGTIDR<br>TSGYAQVTGTIDR<br>AAYQLDPNDGGGQYDNMDIK<br>TSGYAQVTGTIDR<br>AAYQLDPNDGGGQYDNMDIK<br>TAHFVKTSGYAQVTGTIDR<br>TSGYAQVTGTIDR<br>TSGYAQVTGTIDR<br>TSGYAQVTGTIDR<br>TSGYAQVTGTIDR<br>TSGYAQVTGTIDR                                                                                                 |
| 2              | 156806     | 34114.32     | 2              | GLIYTQNNQVIK<br>SNAPNPNWGTPTMAAFPFVSGK                                                                                                                                                                                                                                                                                                                                                                                                                               |
| 3              | 155646     | 18948.17     | 1              | SAHYASTANYQQVTGR                                                                                                                                                                                                                                                                                                                                                                                                                                                     |
|                |            |              |                |                                                                                                                                                                                                                                                                                                                                                                                                                                                                      |
| <b>Band A5</b> |            |              |                |                                                                                                                                                                                                                                                                                                                                                                                                                                                                      |
| Hits           | Protein ID | Protein Mass | No. of Peptide |                                                                                                                                                                                                                                                                                                                                                                                                                                                                      |
| 1              | 115037     | 20656.54     | 23             | TSGYAQVTGTIDR<br>TSGYAQVTGTIDR<br>TSGYAQVTGTIDR<br>TSGYAQVTGTIDR<br>TSGYAQVTGTIDR<br>TSGYAQVTGTIDR<br>TSGYAQVTGTIDR<br>TSGYAQVTGTIDR<br>TSGYAQVTGTIDR<br>TSGYAQVTGTIDR<br>TAHFVKTSGYAQVTGTIDR<br>TSGYAQVTGTIDR<br>TSGYAQVTGTIDR<br>AAYQLDPNDGGGQYDNMDIK<br>TSGYAQVTGTIDR<br>AAYQLDPNDGGGQYDNMDIK<br>TSGYAQVTGTIDR<br>TSGYAQVTGTIDR<br>AAYQLDPNDGGGQYDNMDIK<br>AAYQLDPNDGGGQYDNMDIK<br>AAYQLDPNDGGGQYDNMDIK<br>AAYQLDPNDGGGQYDNMDIK<br>TSGYAQVTGTIDR<br>TSGYAQVTGTIDR |
| 2              | 155817     | 41544.01     | 2              | AVVSDYFPAVQSQLTAYPGYK<br>VGNPAFAYYVDSTGITFSR                                                                                                                                                                                                                                                                                                                                                                                                                         |
| 3              | 155646     | 18948.17     | 1              | SAHYASTANYQQVTGR                                                                                                                                                                                                                                                                                                                                                                                                                                                     |
|                |            |              |                |                                                                                                                                                                                                                                                                                                                                                                                                                                                                      |



|   |        |          |   |                                                                                                                                                                                                                                                                                                                                                                                                                                                                                                                                                          |
|---|--------|----------|---|----------------------------------------------------------------------------------------------------------------------------------------------------------------------------------------------------------------------------------------------------------------------------------------------------------------------------------------------------------------------------------------------------------------------------------------------------------------------------------------------------------------------------------------------------------|
|   |        |          |   | APTWLQVTIFEDIDFGGASHVYK<br>APTWLQVTIFEDIDFGGASHVYK<br>APTWLQVTIFEDIDFGGASHVYK<br>APTWLQVTIFEDIDFGGASHVYK<br>APTWLQVTIFEDIDFGGASHVYK<br>APTWLQVTIFEDIDFGGASHVYK<br>APTWLQVTIFEDIDFGGASHVYK<br>APTWLQVTIFEDIDFGGASHVYK<br>APTWLQVTIFEDIDFGGASHVYK<br>APTWLQVTIFEDIDFGGASHVYK<br>APTWLQVTIFEDIDFGGASHVYK<br>APTWLQVTIFEDIDFGGASHVYK<br>APTWLQVTIFEDIDFGGASHVYK<br>APTWLQVTIFEDIDFGGASHVYK<br>APTWLQVTIFEDIDFGGASHVYK<br>APTWLQVTIFEDIDFGGASHVYK<br>APTWLQVTIFEDIDFGGASHVYK<br>APTWLQVTIFEDIDFGGASHVYK<br>APTWLQVTIFEDIDFGGASHVYK<br>APTWLQVTIFEDIDFGGASHVYK |
| 2 | 157923 | 18919.85 | 4 | SAGYT GALAVHSSEQTLETK<br>SAGYT GALAVHSSEQTLETK<br>SAGYT GALAVHSSEQTLETK<br>KPEFDA VLLATSLVK                                                                                                                                                                                                                                                                                                                                                                                                                                                              |
| 3 | 155646 | 18948.17 | 4 | SAHYASTANYQQVTGR<br>SAHYASTANYQQVTGR<br>SAHYASTANYQQVTGR<br>SAHYASTANYQQVTGR                                                                                                                                                                                                                                                                                                                                                                                                                                                                             |
| 4 | 115037 | 20656.54 | 3 | TSGYA QVTGTIDR<br>TSGYA QVTGTIDR<br>AAYQLDPNDGGGQYDNMDIK                                                                                                                                                                                                                                                                                                                                                                                                                                                                                                 |
| 5 | 92193  | 19499.31 | 3 | TPATHLDAANNLVNQINTSFATAK<br>KPQFDAILLATTLVK<br>KPQFDAILLATTLVK                                                                                                                                                                                                                                                                                                                                                                                                                                                                                           |
| 6 | 157172 | 18447.65 | 3 | AIDLTPAAFQK<br>AIDLTPAAFQK<br>LATLNDGVVDISWK                                                                                                                                                                                                                                                                                                                                                                                                                                                                                                             |
| 7 | 156103 | 14879.71 | 3 | LGYLENNDPYNEHLK<br>WETTYNDGTGQQVPIPDGYK<br>DFALNAGSQITILPADLETK                                                                                                                                                                                                                                                                                                                                                                                                                                                                                          |
| 8 | 157488 | 30733.9  | 1 | TITGLDLYSDASGNPK                                                                                                                                                                                                                                                                                                                                                                                                                                                                                                                                         |
| 9 | 184762 | 17351.86 | 1 | VSDSHVVNDAQVLVTNTK                                                                                                                                                                                                                                                                                                                                                                                                                                                                                                                                       |
|   |        |          |   |                                                                                                                                                                                                                                                                                                                                                                                                                                                                                                                                                          |

| Band A8 |            |              |                |                                                                                                                                                                                                                                                                                                                                                                                                                                                                                                                                                                                                                                                     |
|---------|------------|--------------|----------------|-----------------------------------------------------------------------------------------------------------------------------------------------------------------------------------------------------------------------------------------------------------------------------------------------------------------------------------------------------------------------------------------------------------------------------------------------------------------------------------------------------------------------------------------------------------------------------------------------------------------------------------------------------|
| Hits    | Protein ID | Protein Mass | No. of Peptide |                                                                                                                                                                                                                                                                                                                                                                                                                                                                                                                                                                                                                                                     |
| 1       | 156103     | 14879.71     | 28             | AGQSYVVK<br>AGQSYVVK<br>FTIQAAR<br>LGYLENNDPYNEHLK<br>LGYLENNDPYNEHLK<br>LGYLENNDPYNEHLK<br>LGYLENNDPYNEHLK<br>LGYLENNDPYNEHLK<br>LGYLENNDPYNEHLK<br>LGYLENNDPYNEHLK<br>WETTYNDGTGQQVPIPDGYK<br>WETTYNDGTGQQVPIPDGYK<br>WETTYNDGTGQQVPIPDGYKGTIK<br>WETTYNDGTGQQVPIPDGYKGTIK<br>WETTYNDGTGQQVPIPDGYK<br>WETTYNDGTGQQVPIPDGYKGTIK<br>WETTYNDGTGQQVPIPDGYK<br>AGQSYVVKWETTYNDGTGQQVPIPDGYKGTIK<br>AGQSYVVKWETTYNDGTGQQVPIPDGYK<br>TSYIIVLMGNSGNASPK<br>TSYIIVLMGNSGNASPK<br>DFALNAGSQTITLPADLET<br>DFALNAGSQTITLPADLET<br>DFALNAGSQTITLPADLET<br>DFALNAGSQTITLPADLET<br>DFALNAGSQTITLPADLET<br>FGDLAKDFALNAGSQTITLPADLET<br>FGDLAKDFALNAGSQTITLPADLET |
| 2       | 191377     | 11741.29     | 9              | HQNGVIAGSVAPGGSAGSR<br>HQNGVIAGSVAPGGSAGSR<br>HQNGVIAGSVAPGGSAGSR<br>APTWLQVTIFEDIDFGGASHVYKGPQK<br>APTWLQVTIFEDIDFGGASHVYK<br>APTWLQVTIFEDIDFGGASHVYK<br>APTWLQVTIFEDIDFGGASHVYK<br>APTWLQVTIFEDIDFGGASHVYK<br>APTWLQVTIFEDIDFGGASHVYK                                                                                                                                                                                                                                                                                                                                                                                                             |
| 3       | 156010     | 30340.93     | 3              | KITGLDLYSVDSAGK<br>YVQNVWSGSYALNTK<br>ITGLDLYSVDSAGK                                                                                                                                                                                                                                                                                                                                                                                                                                                                                                                                                                                                |
| 4       | 156218     | 18949.67     | 3              | SHLSSFDDKTSR<br>SKEGSYNFLTK<br>VLNALNTIK                                                                                                                                                                                                                                                                                                                                                                                                                                                                                                                                                                                                            |
| 5       | 157285     | 16118.75     | 3              | TPYFHVEYNK<br>SWVSVDLYEYK<br>ASGISTPWFNVDLGK                                                                                                                                                                                                                                                                                                                                                                                                                                                                                                                                                                                                        |
| 6       | 157923     | 18919.85     | 2              | SAGYTGALAVHSSEQTLET<br>KPEFDAVLLATSLVK                                                                                                                                                                                                                                                                                                                                                                                                                                                                                                                                                                                                              |
| 7       | 155646     | 18948.17     | 1              | SAHYASTANYQQVTGR                                                                                                                                                                                                                                                                                                                                                                                                                                                                                                                                                                                                                                    |
| 8       | 157172     | 18447.65     | 1              | LATLNDGVVDISWK                                                                                                                                                                                                                                                                                                                                                                                                                                                                                                                                                                                                                                      |
| Band A9 |            |              |                |                                                                                                                                                                                                                                                                                                                                                                                                                                                                                                                                                                                                                                                     |
| Hits    | Protein ID | Protein Mass | No. of Peptide |                                                                                                                                                                                                                                                                                                                                                                                                                                                                                                                                                                                                                                                     |
| 1       | 156103     | 14879.71     | 3              | LGYLENNDPYNEHLK<br>WETTYNDGTGQQVPIPDGYK<br>DFALNAGSQTITLPADLET                                                                                                                                                                                                                                                                                                                                                                                                                                                                                                                                                                                      |
| 2       | 184762     | 17351.86     | 1              | VSDSHVVNDAQLVLTNTK                                                                                                                                                                                                                                                                                                                                                                                                                                                                                                                                                                                                                                  |

|                |            |              |                |                                                                                                                                                                                                                                                                                                                                                                                                                                                                                                                                                                                                                                                                                                                                                                              |
|----------------|------------|--------------|----------------|------------------------------------------------------------------------------------------------------------------------------------------------------------------------------------------------------------------------------------------------------------------------------------------------------------------------------------------------------------------------------------------------------------------------------------------------------------------------------------------------------------------------------------------------------------------------------------------------------------------------------------------------------------------------------------------------------------------------------------------------------------------------------|
|                |            |              |                |                                                                                                                                                                                                                                                                                                                                                                                                                                                                                                                                                                                                                                                                                                                                                                              |
| <b>Band B0</b> |            |              |                |                                                                                                                                                                                                                                                                                                                                                                                                                                                                                                                                                                                                                                                                                                                                                                              |
| Hits           | Protein ID | Protein Mass | No. of Peptide | Peptide sequences                                                                                                                                                                                                                                                                                                                                                                                                                                                                                                                                                                                                                                                                                                                                                            |
| 1              | 38405      | 78552.88     | 2              | FASNVSSGVSGINAASWDK<br>GWESGGEDPYLQGVTAETIK                                                                                                                                                                                                                                                                                                                                                                                                                                                                                                                                                                                                                                                                                                                                  |
| <b>Band B1</b> |            |              |                |                                                                                                                                                                                                                                                                                                                                                                                                                                                                                                                                                                                                                                                                                                                                                                              |
| Hits           | Protein ID | Protein Mass | No. of Peptide | Peptide sequences                                                                                                                                                                                                                                                                                                                                                                                                                                                                                                                                                                                                                                                                                                                                                            |
| 1              | 156167     | 64906.84     | 33             | ADTFILIADSILK<br>ADTFILIADSILK<br>ADTFILIADSILK<br>ADTFILIADSILK<br>AIKEWFNNGGVTVTSISLNFFK<br>AIKEWFNNGGVTVTSISLNFFK<br>ATTYTNTAASIK<br>ATTYTNTAASIK<br>DLTWSHASLISASYAK<br>DLTWSHASLISASYAK<br>EWFNNGGVTVTSISLNFFK<br>FASLYSINQNLNGYLGNAIGR<br>FASLYSINQNLNGYLGNAIGR<br>FASLYSINQNLNGYLGNAIGR<br>FASLYSINQNLNGYLGNAIGR<br>FASLYSINQNLNGYLGNAIGR<br>FDSSAAVGTK<br>IDSFWNSNGQYVSQSQTGGVSK<br>IDSFWNSNGQYVSQSQTGGVSK<br>IDSFWNSNGQYVSQSQTGGVSK<br>IDSFWNSNGQYVSQSQTGGVSK<br>QTGDATYVTGTLAPAIYK<br>QTGDATYVTGTLAPAIYK<br>SFTYDGSTLAGQIYK<br>SFTYDGSTLAGQIYK<br>SFTYDGSTLAGQIYK<br>SFTYDGSTLAGQIYK<br>TKIDSFWNSNGQYVSQSQTGGVSK<br>TKIDSFWNSNGQYVSQSQTGGVSK<br>TKIDSFWNSNGQYVSQSQTGGVSK<br>YTVGTSSFNSLVQNVAAADAFFSTIK<br>YTVGTSSFNSLVQNVAAADAFFSTIK<br>YTVGTSSFNSLVQNVAAADAFFSTIK |
| <b>Band B2</b> |            |              |                |                                                                                                                                                                                                                                                                                                                                                                                                                                                                                                                                                                                                                                                                                                                                                                              |
| Hits           | Protein ID | Protein Mass | No. of Peptide | Peptide Sequence                                                                                                                                                                                                                                                                                                                                                                                                                                                                                                                                                                                                                                                                                                                                                             |
| 1              | 155115     | 37564.85     | 7              | VYQESIPSVGYTGK<br>TLILITFDENASTSKR<br>TLILITFDENASTSK<br>GTTDSTFYTHFSSLSTVEHNWDLGNLGR<br>AFDHILQVWFENQDYSTIAK<br>RNQVWSLLLGNIPANLK<br>NQVWSLLLGNIPANLK                                                                                                                                                                                                                                                                                                                                                                                                                                                                                                                                                                                                                       |
| 2              | 84529      | 31936.78     | 1              | VAQNVASAVQDIITK                                                                                                                                                                                                                                                                                                                                                                                                                                                                                                                                                                                                                                                                                                                                                              |
| <b>Band B3</b> |            |              |                |                                                                                                                                                                                                                                                                                                                                                                                                                                                                                                                                                                                                                                                                                                                                                                              |
| Hits           | Protein ID | Protein Mass | No. of Peptide |                                                                                                                                                                                                                                                                                                                                                                                                                                                                                                                                                                                                                                                                                                                                                                              |
| 1              | 84529      | 31936.78     | 8              | DVSIPVENHGYGGATTNNADAYSK<br>VVVFADSYTDNGNDYK<br>FNGWTVPLK<br>VHAAWGAWALENLKK<br>VAQNVASAVQDIITK<br>VHAAWGAWALENLK<br>EFAFFSVAPFDK<br>EFAFFSVAPFDKWPVIK                                                                                                                                                                                                                                                                                                                                                                                                                                                                                                                                                                                                                       |

|   |        |          |   |                                                                                                                                              |
|---|--------|----------|---|----------------------------------------------------------------------------------------------------------------------------------------------|
| 2 | 155115 | 37564.85 | 7 | VYQESIPSVGYTGK<br>TLILITFDENASTSK<br>TLILITFDENASTSK<br>AFDHILQVWFENQDYSTIAK<br>RNQVWSLLLGNI PANLK<br>NQVWSLLLGNI PANLK<br>NQVWSLLLGNI PANLK |
| 3 | 115037 | 20656.54 | 4 | TSGYAQVTGTIDR<br>TSGYAQVTGTIDR<br>TSGYAQVTGTIDR<br>AAYQLDPNDGGGQYDNMDIK                                                                      |
| 4 | 155048 | 46677.27 | 1 | TNQEVLAEFYTTQK                                                                                                                               |
| 5 | 181379 | 41360.8  | 1 | SLTISNVVINDITGSVSEK                                                                                                                          |
|   |        |          |   |                                                                                                                                              |

#### Band B4

| Hits | Protein ID | Protein Mass | No. of Peptide |                                                                                                                                                                                                                                                                                                                                                                    |
|------|------------|--------------|----------------|--------------------------------------------------------------------------------------------------------------------------------------------------------------------------------------------------------------------------------------------------------------------------------------------------------------------------------------------------------------------|
| 1    | 84529      | 31936.78     | 19             | DVSIPVENHGYGGATTNNADAYSK<br>DVSIPVENHGYGGATTNNADAYSK<br>NSEFPPSPYYAGR<br>NSEFPPSPYYAGR<br>VVVFADSYTDNGNDYK<br>VVVFADSYTDNGNDYK<br>NSEFPPSPYYAGR<br>KMIEDYNSYVEGEIK<br>MIEDYNSYVEGEIK<br>NSEFPPSPYYAGR<br>HFFWDSYHPEK<br>NSEFPPSPYYAGR<br>VHAAGAWALENLK<br>VAQNVASAVQDIITK<br>KVHAAGAWALENLK<br>FSNGPTWLEYVAK<br>VHAAGAWALENLK<br>EFAFFSVAPFDK<br>EFAFFSVAPFDKWPVIK |
| 2    | 115037     | 20656.54     | 8              | TSGYAQVTGTIDR<br>TSGYAQVTGTIDR<br>TSGYAQVTGTIDR<br>TSGYAQVTGTIDR<br>TSGYAQVTGTIDR<br>TSGYAQVTGTIDR<br>TSGYAQVTGTIDR<br>AAYQLDPNDGGGQYDNMDIK                                                                                                                                                                                                                        |
| 3    | 115625     | 28451.95     | 2              | DKFDLFGALNLNGVSPGNR<br>YQDVIEYFQQVLDLR                                                                                                                                                                                                                                                                                                                             |
|      |            |              |                |                                                                                                                                                                                                                                                                                                                                                                    |

#### Band B5

| Hits | Protein ID | Protein Mass | No. of Peptide |                                                                                                                                |
|------|------------|--------------|----------------|--------------------------------------------------------------------------------------------------------------------------------|
| 1    | 157263     | 16950.72     | 7              | NGNFVNLHSGK<br>KESSDNENQLWEYR<br>GAEDENGAEVILYEK<br>ESSDNENQLWEYR<br>SGTVAANQQWELVR<br>SGTVAANQQWELVR<br>WLIDHEGYIHSSNPDLVLDIK |
| 2    | 115037     | 20656.54     | 2              | TSGYAQVTGTIDR<br>AAYQLDPNDGGGQYDNMDIK                                                                                          |
| 3    | 191377     | 11741.29     | 2              | HQNGVIAGSVAPGGSAGSR<br>APTWLQVTIFEDIDFGGASHVYK                                                                                 |
| 4    | 157488     | 30733.9      | 1              | TITGLDLYSVDASGNPK                                                                                                              |
|      |            |              |                |                                                                                                                                |

| Band B6 |            |              |                |                                                                                                                                                                                                |
|---------|------------|--------------|----------------|------------------------------------------------------------------------------------------------------------------------------------------------------------------------------------------------|
| Hits    | Protein ID | Protein Mass | No. of Peptide |                                                                                                                                                                                                |
| 1       | 115037     | 20656.54     | 3              | TSGYAQVTGTIDR<br>TSGYAQVTGTIDR<br>AAYQLDPNDGGGQYDNMDIK                                                                                                                                         |
| 2       | 156103     | 14879.71     | 3              | LGYLENNDPYNEHLK<br>WETTYNDGTGQQVPIPDGYK<br>DFALNAGSQTITLPADLETK                                                                                                                                |
| 3       | 191377     | 11741.29     | 3              | HQNGVIAGSVAPGGSAGSR<br>APTWLQVTIFEDIDFGGASHVYK<br>APTWLQVTIFEDIDFGGASHVYK                                                                                                                      |
| 4       | 155646     | 18948.17     | 1              | SAHYASTANYQQVTGR                                                                                                                                                                               |
|         |            |              |                |                                                                                                                                                                                                |
| Band B7 |            |              |                |                                                                                                                                                                                                |
| Hits    | Protein ID | Protein Mass | No. of Peptide |                                                                                                                                                                                                |
| 1       | 156103     | 14879.71     | 8              | LGYLENNDPYNEHLK<br>WETTYNDGTGQQVPIPDGYK<br>WETTYNDGTGQQVPIPDGYK<br>WETTYNDGTGQQVPIPDGYKGTIK<br>TSYIIVLMGNSGNASPK<br>DFALNAGSQTITLPADLETK<br>DFALNAGSQTITLPADLETK<br>FGDLAKDFALNAGSQTITLPADLETK |
| 2       | 156010     | 30340.93     | 2              | YVQNVWSGSYALNTK<br>ITGLDLYSVDSAGK                                                                                                                                                              |
| 3       | 155263     | 2114.11      | 1              | ISPDIVQAGSELTIEASGTVK                                                                                                                                                                          |
|         |            |              |                |                                                                                                                                                                                                |
| Band B8 |            |              |                |                                                                                                                                                                                                |
| Hits    | Protein ID | Protein Mass | No. of Peptide |                                                                                                                                                                                                |
| 1       | 156103     | 14879.71     | 3              | LGYLENNDPYNEHLK<br>WETTYNDGTGQQVPIPDGYK<br>WETTYNDGTGQQVPIPDGYK                                                                                                                                |
